# Supplementary material for: Noble metal sensitized invasive porous bioelectrodes: advanced medical device for enhanced neuronal activity and chronic alcohol treatment
Source: Royal Society of Chemistry journal article supplement (doi:10.1039/d0ra07922g), 2020-01-01
Supplement: d0ra07922g1.pdf [file d0ra07922g1.pdf]

## Supporting Information

### **Noble Metal Sensitized Invasive Porous Bioelectrodes: Advanced Medical Device for Enhanced Neuronal Activity and Chronic Alcohol Treatment**

Hong Soo Kim, ‡<sup>a</sup> Hansaem Choi, ‡<sup>a</sup> Monica Claire Flores, ‡<sup>a</sup> Abdul Razzaq, <sup>b</sup> Young Seob Gwak, <sup>c</sup> Danbi Ahn, <sup>c</sup> Mi Seon Kim, <sup>d</sup> Ogan Gurel, <sup>e</sup> Bong Hyo Lee <sup>\*f</sup> and Su-Il In<sup>\*a</sup>

<sup>a</sup> Department of Energy Science & Engineering, Daegu Gyeongbuk Institute of Science & Technology (DGIST), 333 Techno Jungang-daero, Hyeonpung-eup, Dalseong-gun, Daegu, 42988, Republic of Korea.

<sup>b</sup> Department of Chemical Engineering, COMSATS University Islamabad, Lahore Campus, 1.5 KM Defence Road, Off Raiwind Road, Lahore, 54000, Pakistan.

<sup>c</sup> Department of Physiology, College of Korean Medicine, Daegu Haany University, 136 Sincheondong-ro, Suseong-gu, Daegu, 42158, Republic of Korea.

<sup>d</sup> Clinical Trials Management Division, Pharmaceutical Safety Bureau, Ministry of Food and Drug Safety, Cheongju-si, Chungcheongbuk-do, Republic of Korea.

<sup>e</sup> College of Transdisciplinary Studies, Daegu Gyeongbuk Institute of Science & Technology (DGIST), 333 Techno Jungang-daero, Hyeonpung-eup, Dalseong-gun, Daegu, 42988, Republic of Korea.

<sup>f</sup> Department of Acupuncture, Moxibustion, and Acupoint, College of Korean Medicine, Daegu Haany University, 136 Sincheondong-ro, Suseong-gu, Daegu, 42158, Republic of Korea.

\* Correspondence should be addressed to B. H. L (e-mail: dlqhdgy@dhu.ac.kr) and S.-I. In (e-mail: insuil@dgist.ac.kr)

‡ These authors contributed equally to this work.

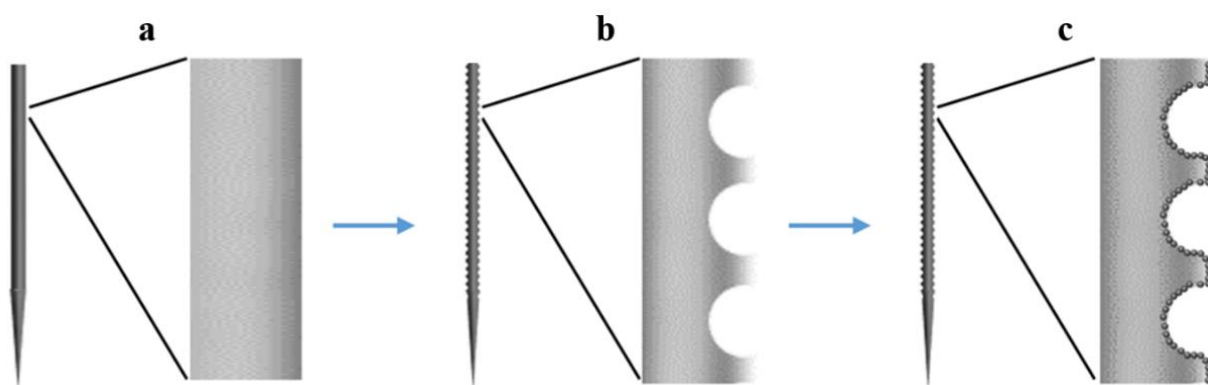

**Fig. S1.** Invasive bioelectrode surface modification strategy: (a) An invasive conventional bioelectrode (ICB), (b) An invasive porous bioelectrode (IPB) is formed by electrochemical anodization of ICB in a fluorine-based ethylene glycol electrolyte, and (c) Noble metal nanoparticles are electrodeposited on surface of IPB.

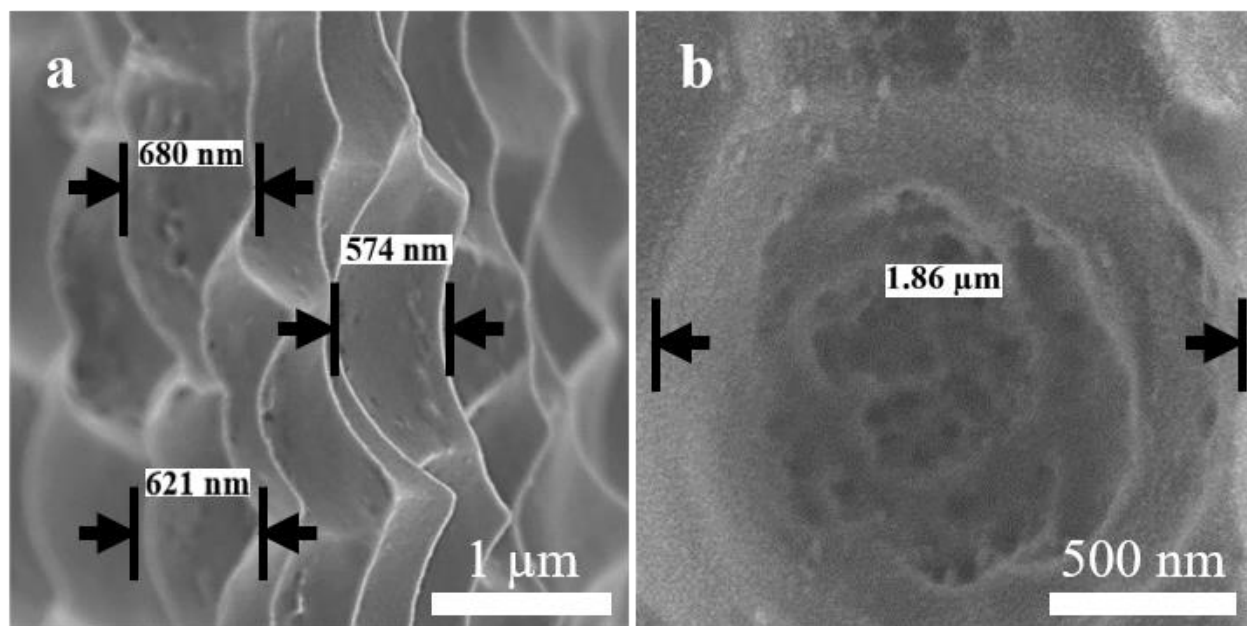

**Fig. S2.** High resolution FE-SEM images of invasive porous bioelectrode (IPB) showing: (a) cross-sectional image and (b) surface pore.

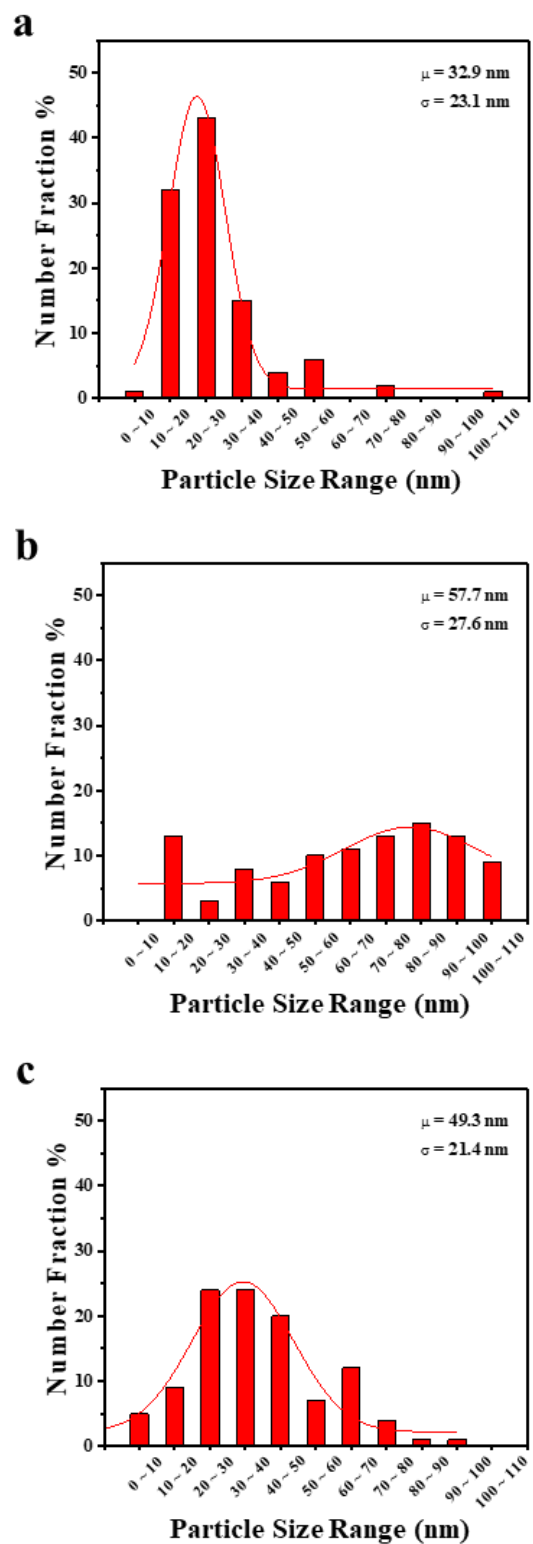

**Fig. S3.** Histograms showing size distribution of nanoparticles electrodeposited on invasive porous bioelectrode (IPB): (a) Ag, (b) Au and (c) Pt.

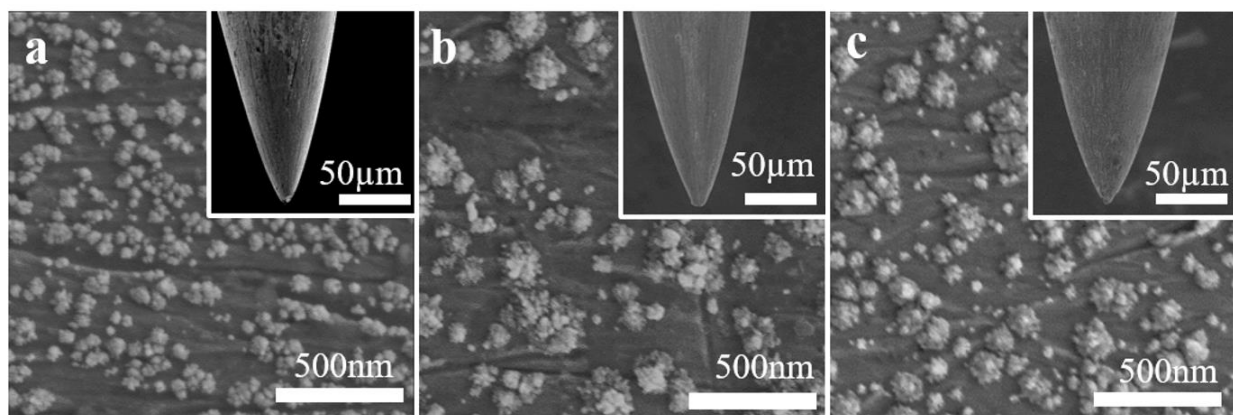

**Fig. S4.** FE-SEM surface images of nanoparticles electrodeposited onto invasive conventional bioelectrode (ICB): (a) Ag-ICB, (b) Au-ICB and (c) Pt-ICB. Inset shows tips of bioelectrodes.

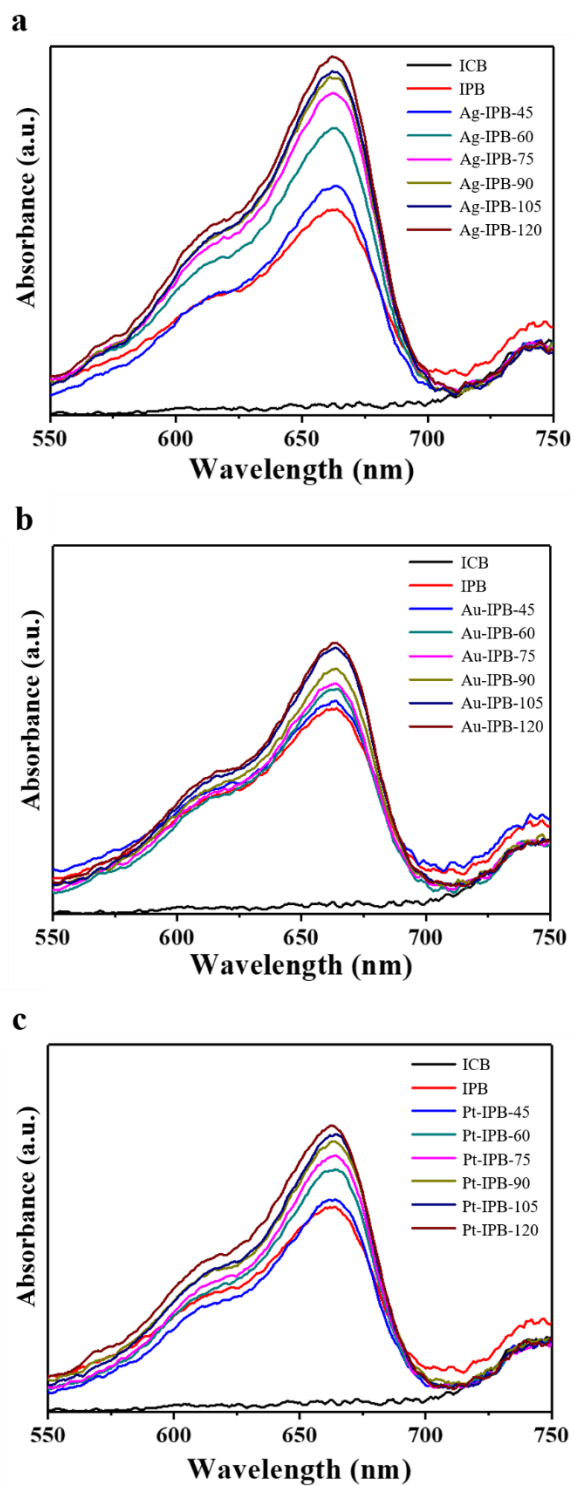

**Fig. S5.** Absorption spectra for methylene blue dye adsorbed on ICB, IPB,  $x$ -IPB with different electrodeposition times: (a) Ag-IPB, (b) Au-IPB and (c) Pt-IPB.

| Sample                                            | ICB  | IPB  | <i>x</i> -IPB-<br>45             | <i>x</i> -IPB-<br>60             | <i>x</i> -IPB-<br>75             | <i>x</i> -IPB-<br>90             | <i>x</i> -IPB-<br>105            | <i>x</i> -IPB-<br>120            |
|---------------------------------------------------|------|------|----------------------------------|----------------------------------|----------------------------------|----------------------------------|----------------------------------|----------------------------------|
| Deposition<br>Conditions                          | -    | -    | 2 V<br>45 s                      | 2 V<br>60 s                      | 2 V<br>75 s                      | 2 V<br>90 s                      | 2 V<br>105 s                     | 2 V<br>120 s                     |
| Surface<br>Area (m <sup>2</sup> g <sup>-1</sup> ) | 0.04 | 1.03 | Ag: 1.17<br>Au: 1.06<br>Pt: 1.07 | Ag: 1.40<br>Au: 1.16<br>Pt: 1.24 | Ag: 1.49<br>Au: 1.18<br>Pt: 1.30 | Ag: 1.55<br>Au: 1.29<br>Pt: 1.36 | Ag: 1.57<br>Au: 1.36<br>Pt: 1.38 | Ag: 1.64<br>Au: 1.38<br>Pt: 1.41 |

**Table S1.** Surface areas determined by methylene blue dye adsorption for ICB, IPB, and *x*-IPB (*x* = Ag, Au and Pt) with different electrodeposition times.

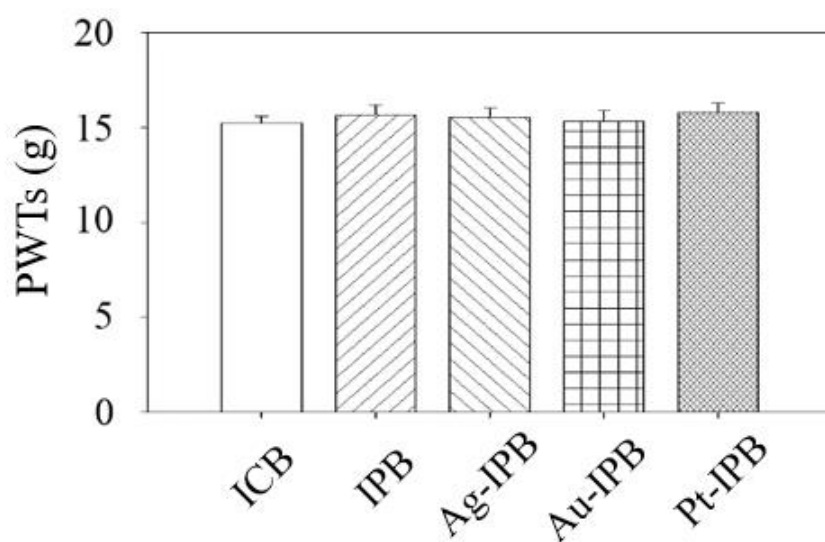

**Fig. S6.** Mechanical sensitivity in the paw withdrawal thresholds (PWTs) among ICB, IPB and *x*-IPB (where *x* = Ag, Au and Pt) groups before stimulation.

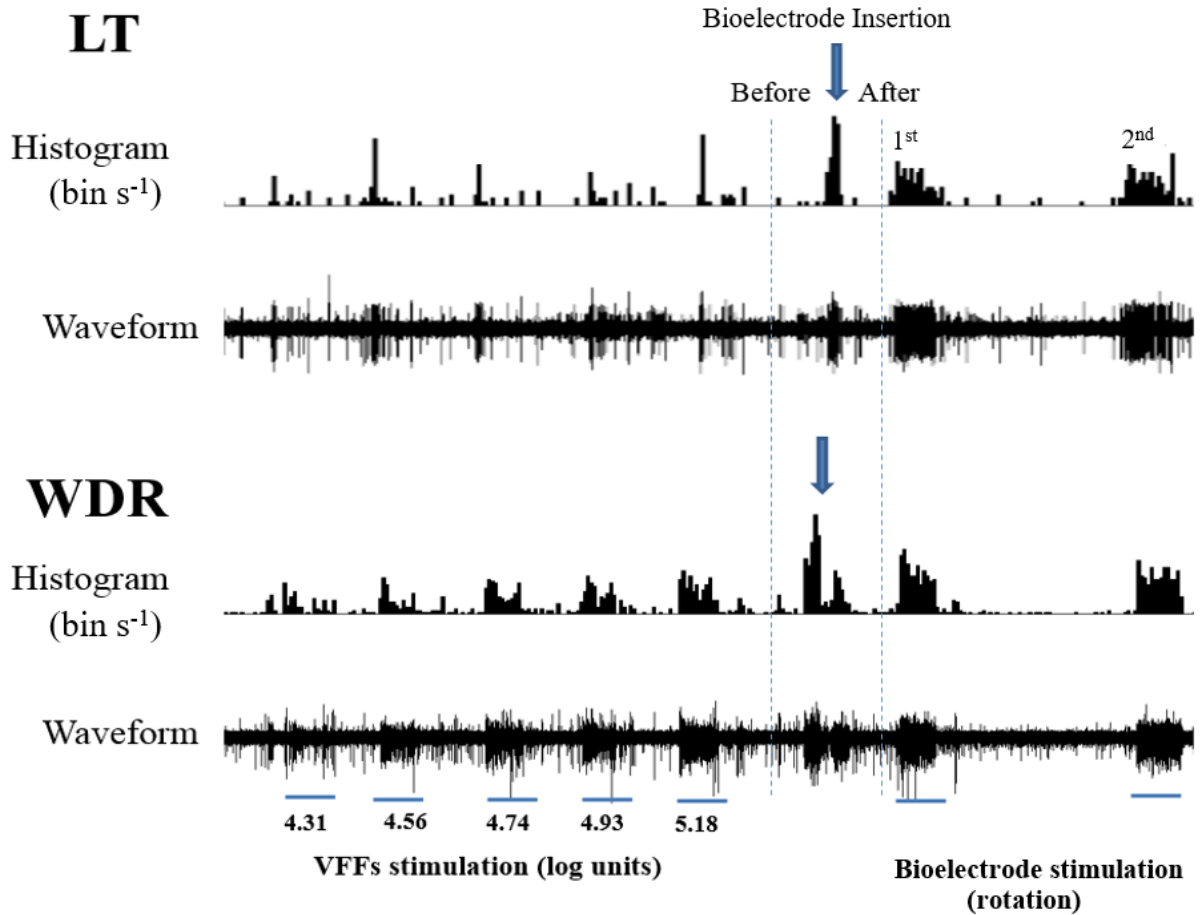

**Fig. S7.** Characterization of spinal dorsal horn neuronal phenotype and their response activity using invasive conventional bioelectrode.

**Explanation:** LT neurons (upper) showed strong response activity at only the initial mechanical stimulation, whereas WDR neurons (lower) showed strong activity during the VFFs stimulation. Arrow: the responses to bioelectrode insertion. Comparison of the response before and after bioelectrode insertion indicates no significant difference. Bar: Bioelectrode stimulation for 10 s; manual stimulation with rotation (rotation per second). 1<sup>st</sup> and 2<sup>nd</sup> indicate sequential 10 s bioelectrode stimulations.



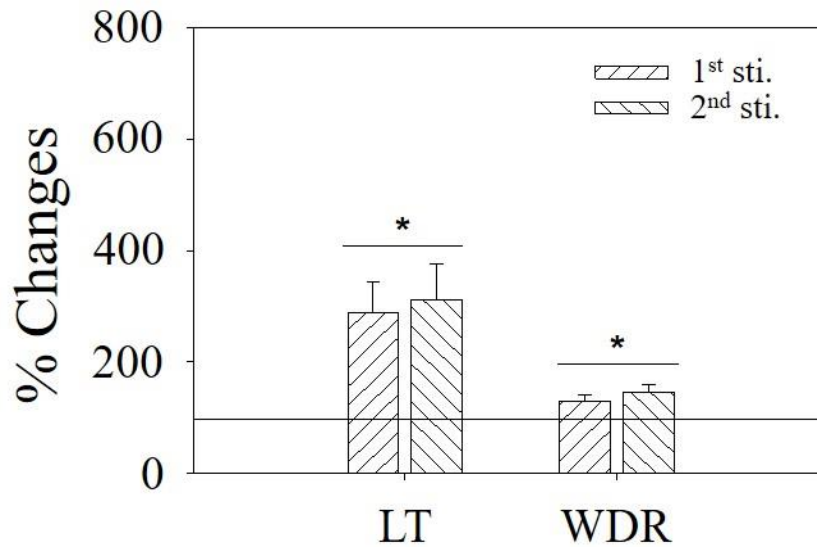

**Fig. S8.** Changes of neuronal responsiveness to stimulation for invasive conventional bioelectrode (ICB) groups.

**Explanation:** The activity of LT neurons ( $n = 26$ ) with bioelectrode stimulation was  $288.2 \pm 56.5$  % (1<sup>st</sup> bioelectrode stimulation) and  $312.5 \pm 63.9$  % (2<sup>nd</sup> bioelectrode stimulation), showing a significant increase as compared to before stimulation (\* $p < 0.05$ ). The activity of WDR neurons ( $n = 23$ ) shows  $129.1 \pm 12.8$  % (1<sup>st</sup>) and  $146.6 \pm 13.5$  % (2<sup>nd</sup>). The comparison between 1<sup>st</sup> and 2<sup>nd</sup> stimulation does not show any significant changes. Horizontal line: 100 % of activity induced by VFFs stimulation.

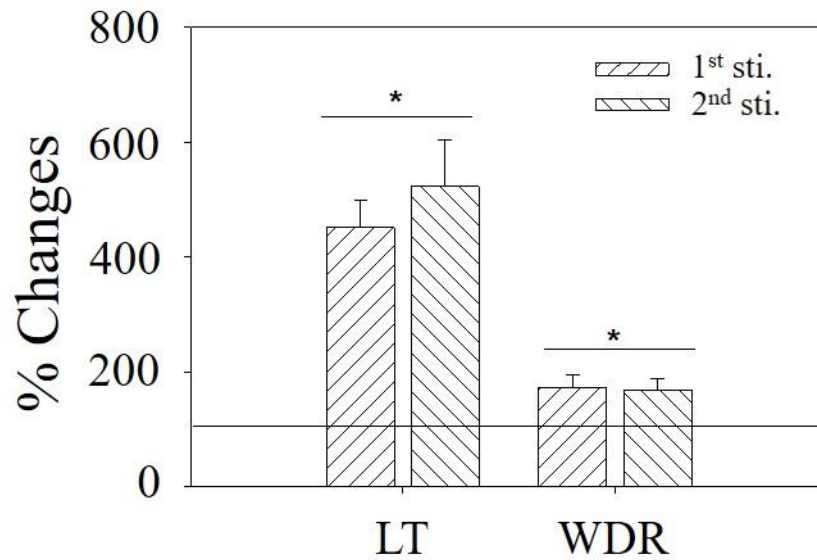

**Fig. S9.** Changes of neuronal responsiveness to stimulation for invasive porous bioelectrode (IPB) groups.

**Explanation:** The activity of LT neurons ( $n = 14$ ) with bioelectrode stimulation was  $451.8 \pm 46.4 \%$  (1<sup>st</sup> bioelectrode stimulation) and  $522.8 \pm 82 \%$  (2<sup>nd</sup> bioelectrode stimulation), which shows a significant increase as compared to before stimulation ( $*p < 0.05$ ). The activity of WDR neurons ( $n = 10$ ) with bioelectrode stimulation was  $173.6 \pm 20.6 \%$  (1<sup>st</sup>) and  $168.1 \pm 20.8 \%$  (2<sup>nd</sup>) and also shows a significant increase ( $*p < 0.05$ ). Comparison between 1<sup>st</sup> and 2<sup>nd</sup> stimulations shows little variation. Horizontal line: 100 % of activity induced by VFFs stimulation.

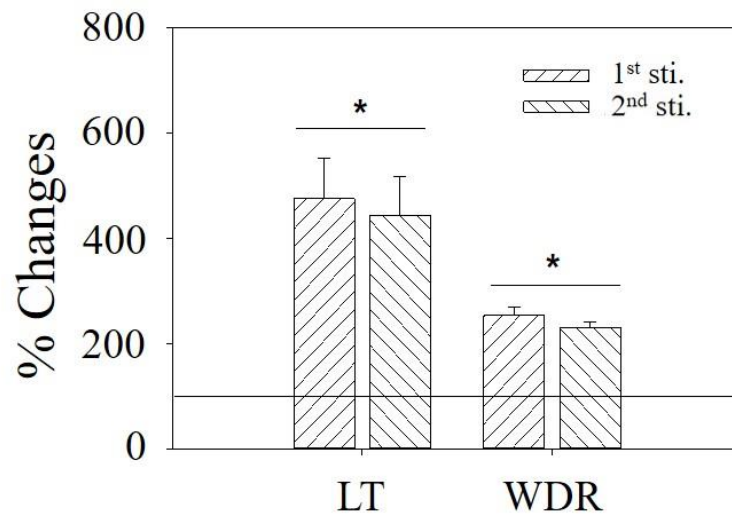

**Fig. S10.** Changes of neuronal responsiveness to stimulation in Ag-IPB groups.

**Explanation:** The activity of LT neurons ( $n = 14$ ) with bioelectrode stimulation was  $475.4 \pm 77.5$  % (1<sup>st</sup> bioelectrode stimulation) and  $443.6 \pm 74.2$  % (2<sup>nd</sup> bioelectrode stimulation), thus showing a significant increase as compared to before stimulation (\* $p < 0.05$ ). In addition, the activity of WDR neurons ( $n = 13$ ) with bioelectrode stimulation was  $253.6 \pm 16.2$  % (1<sup>st</sup>) and  $230.7 \pm 10.7$  % (2<sup>nd</sup>), showing a significant increase (\* $p < 0.05$ ). However, the comparison between the 1<sup>st</sup> and 2<sup>nd</sup> stimulations does not show a significant change. Horizontal line: 100 % of activity induced by VFFs stimulation.

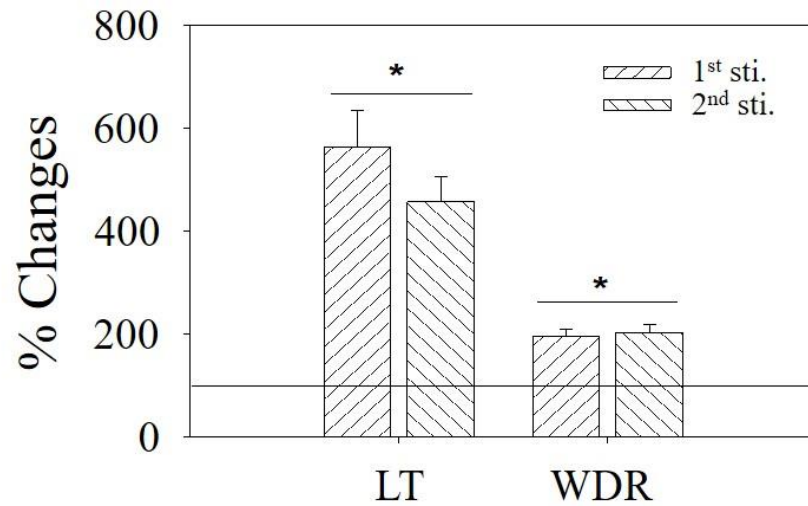

**Fig. S11.** Changes of neuronal responsiveness to stimulation in Au-IPB groups.

**Explanation:** The activity of LT neurons ( $n = 13$ ) with bioelectrode stimulation is  $562.9 \pm 72.4$  % (1<sup>st</sup> bioelectrode stimulation) and  $457.1 \pm 49.5$  % (2<sup>nd</sup> bioelectrode stimulation), thus showing a significant increase as compared to before stimulation (\* $p < 0.05$ ). In addition, the activity of WDR neurons ( $n = 15$ ) with bioelectrode stimulation is  $195.4 \pm 13.2$  % (1<sup>st</sup>) and  $203.1 \pm 14.8$  % (2<sup>nd</sup>), thus displaying a significant increase (\* $p < 0.05$ ). However, the comparison between 1<sup>st</sup> and 2<sup>nd</sup> does not show significant changes. Horizontal line: 100 % of activity induced by VFFs stimulation.

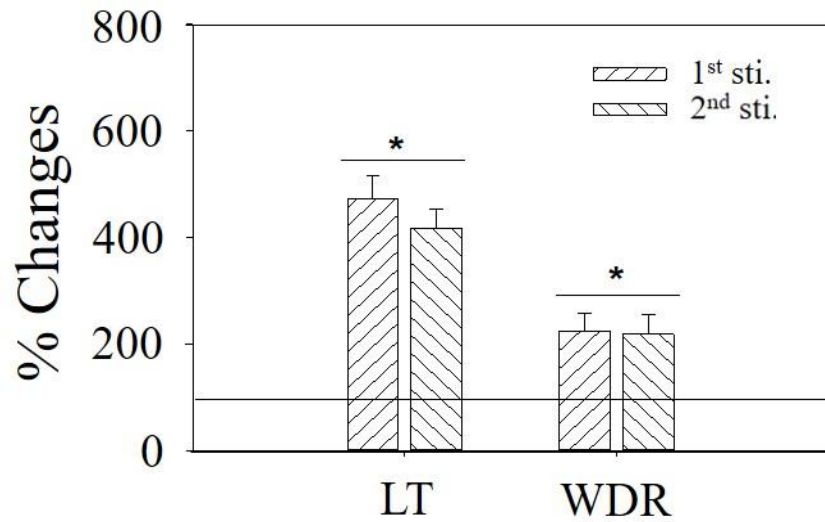

**Fig. S12.** Changes of neuronal responsiveness to stimulation in Pt-IPB groups.

**Explanation:** The activity of LT neurons ( $n = 14$ ) with bioelectrode stimulation was  $472.9 \pm 42.7$  % (1<sup>st</sup> bioelectrode stimulation) and  $418.1 \pm 36.35$  % (2<sup>nd</sup> bioelectrode stimulation), showing a significant increase as compared to before stimulation (\* $p < 0.05$ ). Moreover, the activity of WDR neurons ( $n = 12$ ) with bioelectrode stimulation was  $223.9 \pm 33.8$  % (1<sup>st</sup>) and  $218.5 \pm 36.1$  % (2<sup>nd</sup>), which also exhibits a significant increase (\* $p < 0.05$ ). However, the comparison between the 1<sup>st</sup> and 2<sup>nd</sup> stimulations does not show significant changes. Horizontal line: 100 % of activity induced by VFFs stimulation.
